# Supplementary material for: Aerobic oxidation of fluorene to fluorenone over Co–Cu bimetal oxides
Source: Royal Society of Chemistry journal article supplement (doi:10.1039/c9nj00499h), 2019-01-01
Supplement: c9nj00499h1.pdf [file c9nj00499h1.pdf]

## Supplementary Information

### Aerobic oxidation of fluorene to fluorenone over Co-Cu bimetal oxides

Jing Luo,<sup>a,b</sup> Keng Xuan,<sup>a,b</sup> Yanxia Wang,<sup>a,b</sup> Feng Li,<sup>a</sup> Feng Wang,<sup>a</sup> Yanfeng Pu,<sup>a</sup> Lei Li,<sup>a</sup> Ning Zhao,<sup>\*a</sup> and Fukui Xiao<sup>\*a</sup>

a. State Key Laboratory of Coal Conversion, Institute of Coal Chemistry, Chinese Academy of Sciences, Taiyuan 030001, PR China; E-mail: zhaoning@sxicc.ac.cn, xiaofk@sxicc.ac.cn.

b. University of Chinese Academy of Sciences, Beijing 100049, PR China

#### Table of Contents

Table S1 The ICP results of  $\text{Co}_{1-x}\text{Cu}_x$

Fig. S1 TEM and HRTEM images of  $\text{Co}_{1-x}\text{Cu}_x$

Fig. S2 XRD profiles of  $\text{Co}_{0.7}\text{Cu}_{0.3}$  catalyst before and after reaction

Fig. S3 FT-IR spectra of  $\text{Co}_{0.7}\text{Cu}_{0.3}$  catalyst before and after reaction

Fig. S4 TEM and HRTEM images of  $\text{Co}_{0.7}\text{Cu}_{0.3}$  catalyst before and after reaction

Fig. S5 XPS spectra of  $\text{Co}_{0.7}\text{Cu}_{0.3}$  catalyst before and after reaction

Table S2 XPS survey statistics of  $\text{Co}_{0.7}\text{Cu}_{0.3}$  catalyst before and after reaction

Fig. S6  $\text{H}_2$ -TPR profiles of  $\text{Co}_{0.7}\text{Cu}_{0.3}$  catalyst before and after reaction

Table S1 The ICP results of  $\text{Co}_{1-x}\text{Cu}_x$

| Sample                           | Co (wt%) | Cu (wt%) | Cu/(Co+Cu) molar ratio | Cu/(Co+Cu) feed molar ratio |
|----------------------------------|----------|----------|------------------------|-----------------------------|
| $\text{Co}_{0.9}\text{Cu}_{0.1}$ | 79.70    | 9.65     | 0.101                  | 0.1                         |
| $\text{Co}_{0.7}\text{Cu}_{0.3}$ | 57.83    | 26.79    | 0.301                  | 0.3                         |
| $\text{Co}_{0.5}\text{Cu}_{0.5}$ | 43.14    | 45.90    | 0.497                  | 0.5                         |
| $\text{Co}_{0.3}\text{Cu}_{0.7}$ | 24.20    | 62.14    | 0.704                  | 0.7                         |

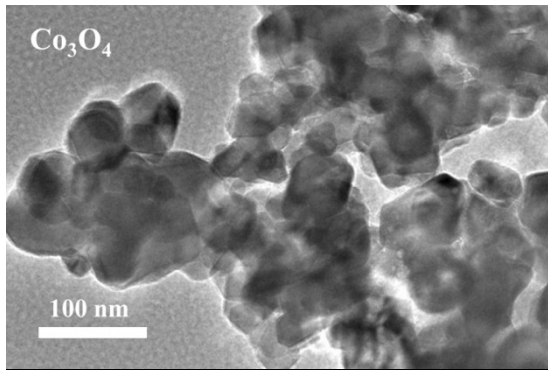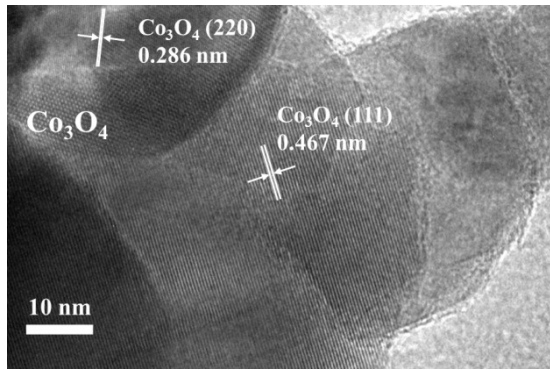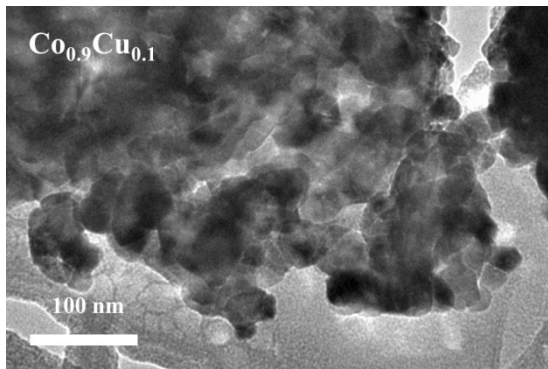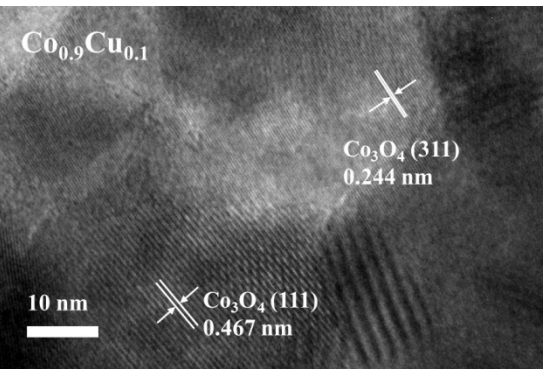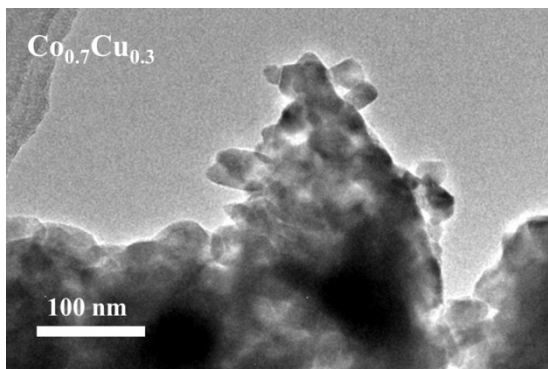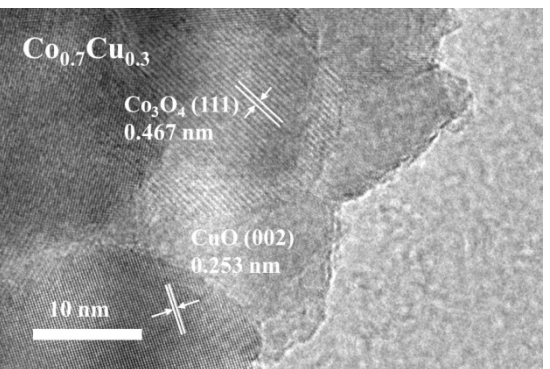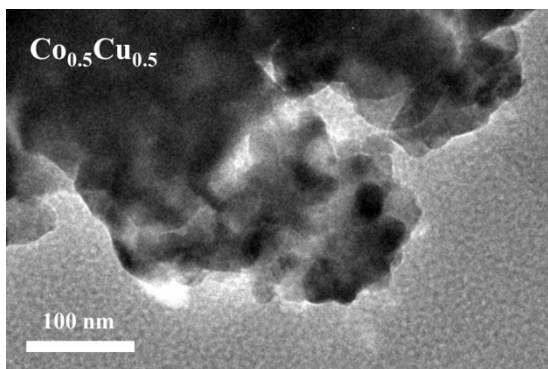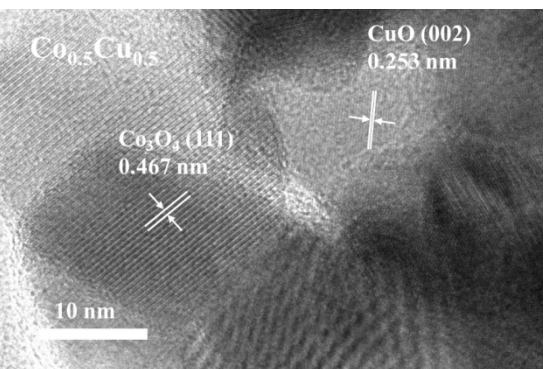

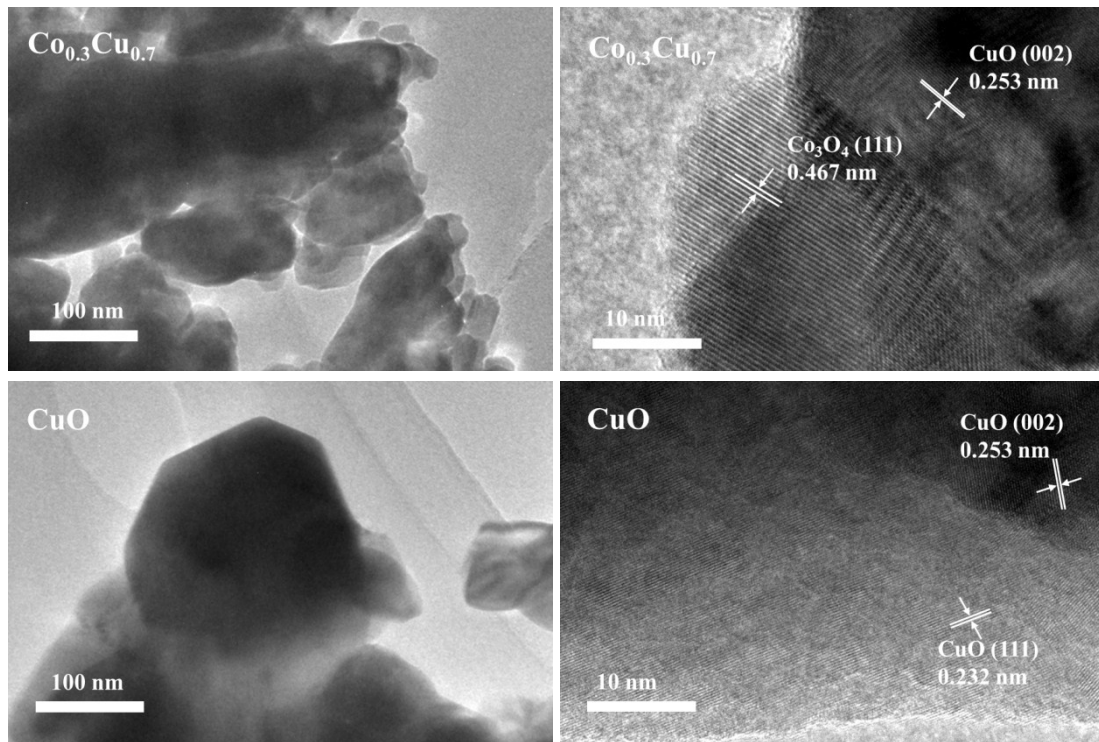

Fig. S1 TEM and HRTEM images of  $\text{Co}_{1-x}\text{Cu}_x$

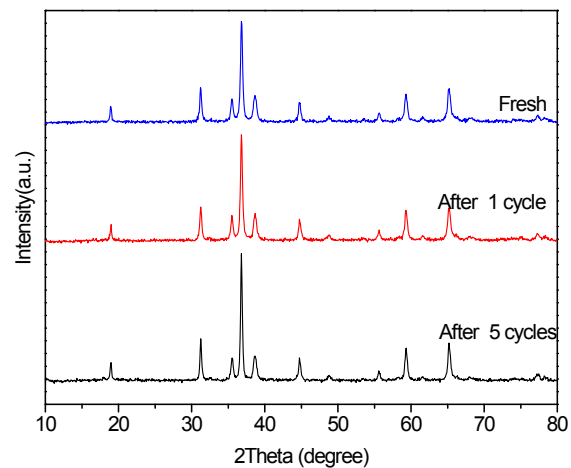

Fig. S2 XRD profiles of  $\text{Co}_{0.7}\text{Cu}_{0.3}$  catalyst before and after reaction

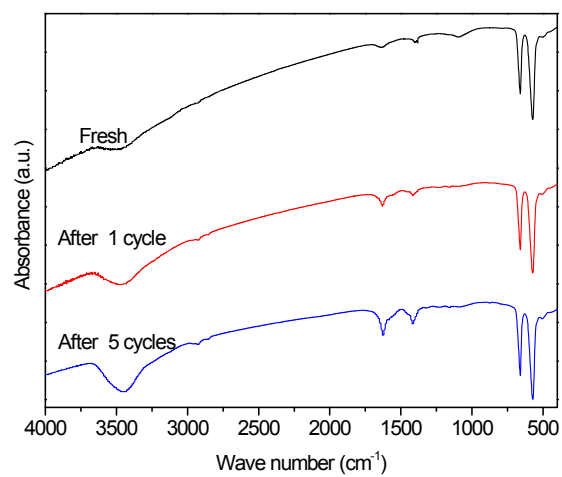

Fig. S3 FT-IR spectra of  $\text{Co}_{0.7}\text{Cu}_{0.3}$  catalyst before and after reaction

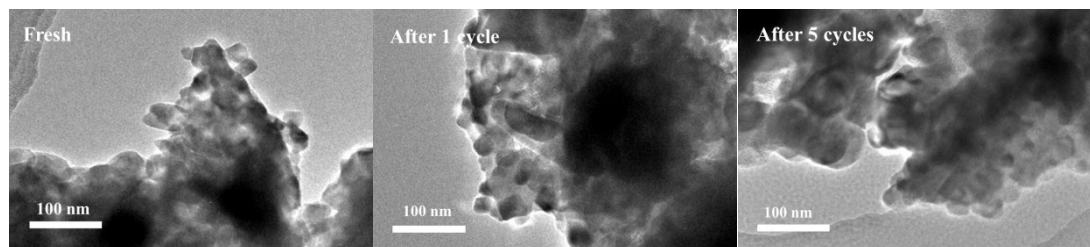

Fig. S4 TEM and HRTEM images of  $\text{Co}_{0.7}\text{Cu}_{0.3}$  catalyst before and after reaction

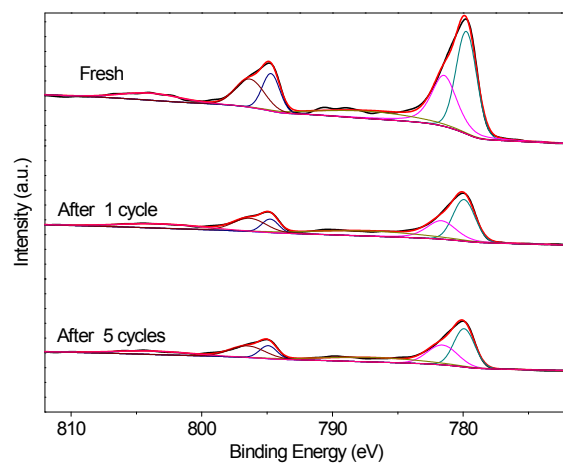

a)

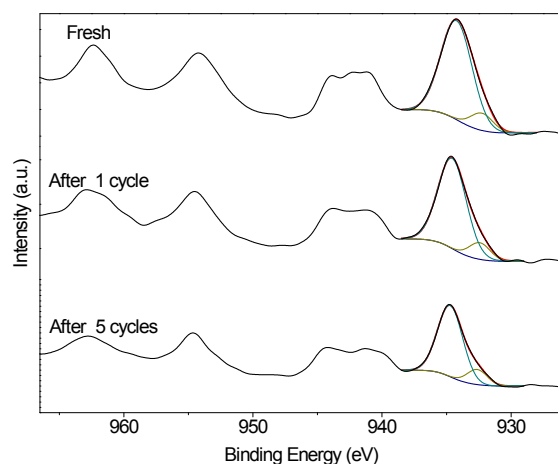

b)

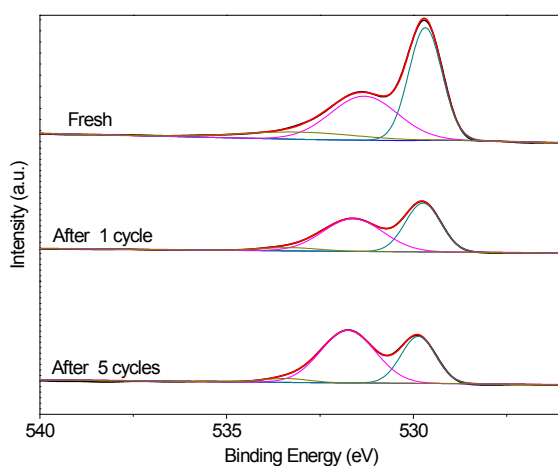

c)

Fig. S5 XPS spectra of  $\text{Co}_{0.7}\text{Cu}_{0.3}$  catalyst before and after reaction a) Co 2p spectra b) Cu 2p spectra and c) O 1s spectra

Table S2 XPS survey statistics of  $\text{Co}_{0.7}\text{Cu}_{0.3}$  catalyst before and after reaction

| Sample         | Co 2p (%)        |                  |                                 | Cu 2p (%)                 |                  |                                            | O 1s (%)     |                 |                  |
|----------------|------------------|------------------|---------------------------------|---------------------------|------------------|--------------------------------------------|--------------|-----------------|------------------|
|                | $\text{Co}^{2+}$ | $\text{Co}^{3+}$ | $\text{Co}^{3+}/\text{Co}^{2+}$ | $\text{Cu}^+/\text{Cu}^0$ | $\text{Cu}^{2+}$ | $\text{Cu}^{2+}/(\text{Cu}^+/\text{Cu}^0)$ | $\text{O}_I$ | $\text{O}_{II}$ | $\text{O}_{III}$ |
| Fresh          | 39.77            | 60.23            | 1.51                            | 88.83                     | 11.17            | 7.95                                       | 10.24        | 40.68           | 49.08            |
| After 1 cycle  | 40.64            | 59.36            | 1.46                            | 88.23                     | 11.77            | 7.50                                       | 4.85         | 50.53           | 44.62            |
| After 5 cycles | 42.75            | 57.25            | 1.34                            | 85.46                     | 14.54            | 5.88                                       | 3.77         | 61.49           | 34.74            |

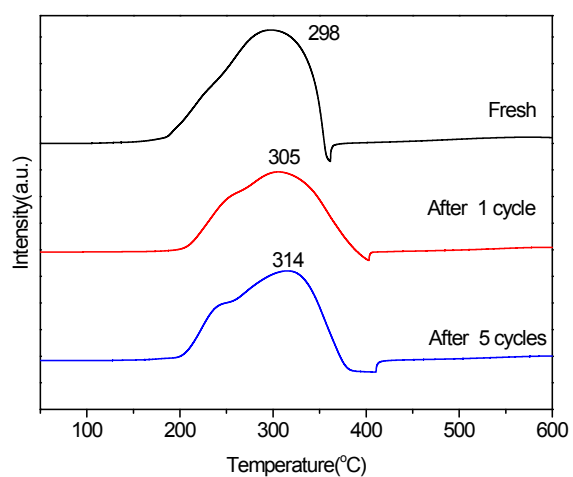

Fig. S6  $\text{H}_2$ -TPR profiles of  $\text{Co}_{0.7}\text{Cu}_{0.3}$  catalyst before and after reaction
